# Supplementary material for: Dynamics of archaea at fine spatial scales in Shark Bay mat microbiomes
Source: PubMed Central journal article supplement (PMC5387419; doi:10.1038/srep46160), 2017-04-11
Supplement: srep46160-s1.pdf [file srep46160-s1.pdf]

## **Dynamics of archaea at fine spatial scales in Shark Bay mat microbiomes<sup>¶</sup>**

Hon Lun Wong<sup>1,3\*</sup>, Pieter T. Visscher<sup>2,3\*</sup>, Richard Allen White III<sup>4\*</sup>, Daniela-Lee Smith<sup>1</sup>, Molly M. Patterson<sup>2</sup>, Brendan P. Burns<sup>1,3</sup>

<sup>1</sup>School of Biotechnology and Biomolecular Sciences, The University of New South Wales, Sydney, Australia

<sup>2</sup>Department of Marine Sciences, University of Connecticut, USA

<sup>3</sup>Australian Centre for Astrobiology, University of New South Wales Sydney, Australia

<sup>4</sup>Earth and Biological Sciences Directorate, Pacific Northwest National Laboratory, Richland, Washington 99352, USA

## **Supplementary information of figures/tables accompanying SREP-16-45815.**

**Supplementary Figure 1. Rarefaction curves of smooth and pustular mats layers.** The bottom layer of pustular mats (PL5, 8 – 10 mm) has the highest number of different OTUs, followed by the bottom layer of smooth mats (SL10, 18 – 20 mm) and the 6<sup>th</sup> layer of smooth mats (SL6, 10 – 12 mm). PL1 to PL5 refer to pustular mat layers 1 - 5, while SL1 – SL10 refer to smooth mat layers 1 – 10.

**Supplementary Figure 2. Abundance of prominent classes and taxonomic subgroups by depth in smooth mats.** **A.** Parvarchaeota, **B.** Thermoplasmata, **C.** Methanogens, **D.** Others, including Marine Benthic Group B (MBGB) (Under phylum Crenarchaeota in Greengenes database, while under Thaumarchaeota in Silva database), Halobacteria, Thermoprotei, Thermococci and Miscellaneous Crenarchaeota Group (MCG).

**Supplementary Figure 3. STAMP analysis of taxonomy enriched or depleted between the designated layers and all other layers in smooth mats.** Surface group compared to the other layers (sub-surface, anoxic, bottom layers), showing the surface of smooth mats is characterised by Parvarchaeota order YLA114 and Thermoplasmata lineage CCA47.

**Supplementary Figure 4. STAMP analysis of taxonomy enriched or depleted between the designated layers and all other layers in smooth mats.** Subsurface compared to all other layers (surface, anoxic, bottom layers), showing subsurface is represented by class Marine Benthic Group B (MBGB).

**Supplementary Figure 5. STAMP analysis of taxonomy enriched or depleted between the designated layers and all other layers in smooth mats (obtained from cluster analysis in Figure 2).** Bottom layer compared to all other layers (surface, sub-surface, anoxic), showing bottom is characterised mainly by Parvarchaeota order WCHD3-30, various methylotrophic methanogens (Methanobacteriales, Methanococcales) and Thermoplasmata lineage DHVEG-1.

**Supplementary Figure 6. Abundance of prominent classes and taxonomic subgroups by depth in pustular mats.** **A.** Halobacteria, **B.** Parvarchaeota and Thaumarchaeota. Vertical depth of 10 mm, dissected into five two mm-layers. Lines indicate the line of sectioning.

**Supplementary Figure 7. Measurements of water depth, salinity, temperature and light intensity in Shark Bay at the time of sampling.** Measurements were taken during the transition from high tide to low tide in smooth (A) and pustular (B) microbial mats in Nilemah, Shark Bay.

**Supplementary Figure 8. Vertical cross section of Shark Bay microbial mats indicating layers analysed.** **A.** Smooth mat sample of 2 cm vertical depth, dissected into ten 2 mm-layers. **B.** Pustular mat sample of 1 cm vertical depth, dissected into five 2 mm-layers. Lines indicate the line of sectioning.

**Supplementary Table 1.** Archaeal 16S rRNA gene diversity analyses of smooth and pustular mats in Shark Bay.

**Supplementary Table 2.** Relative abundance of archaeal classes in smooth and pustular mats.

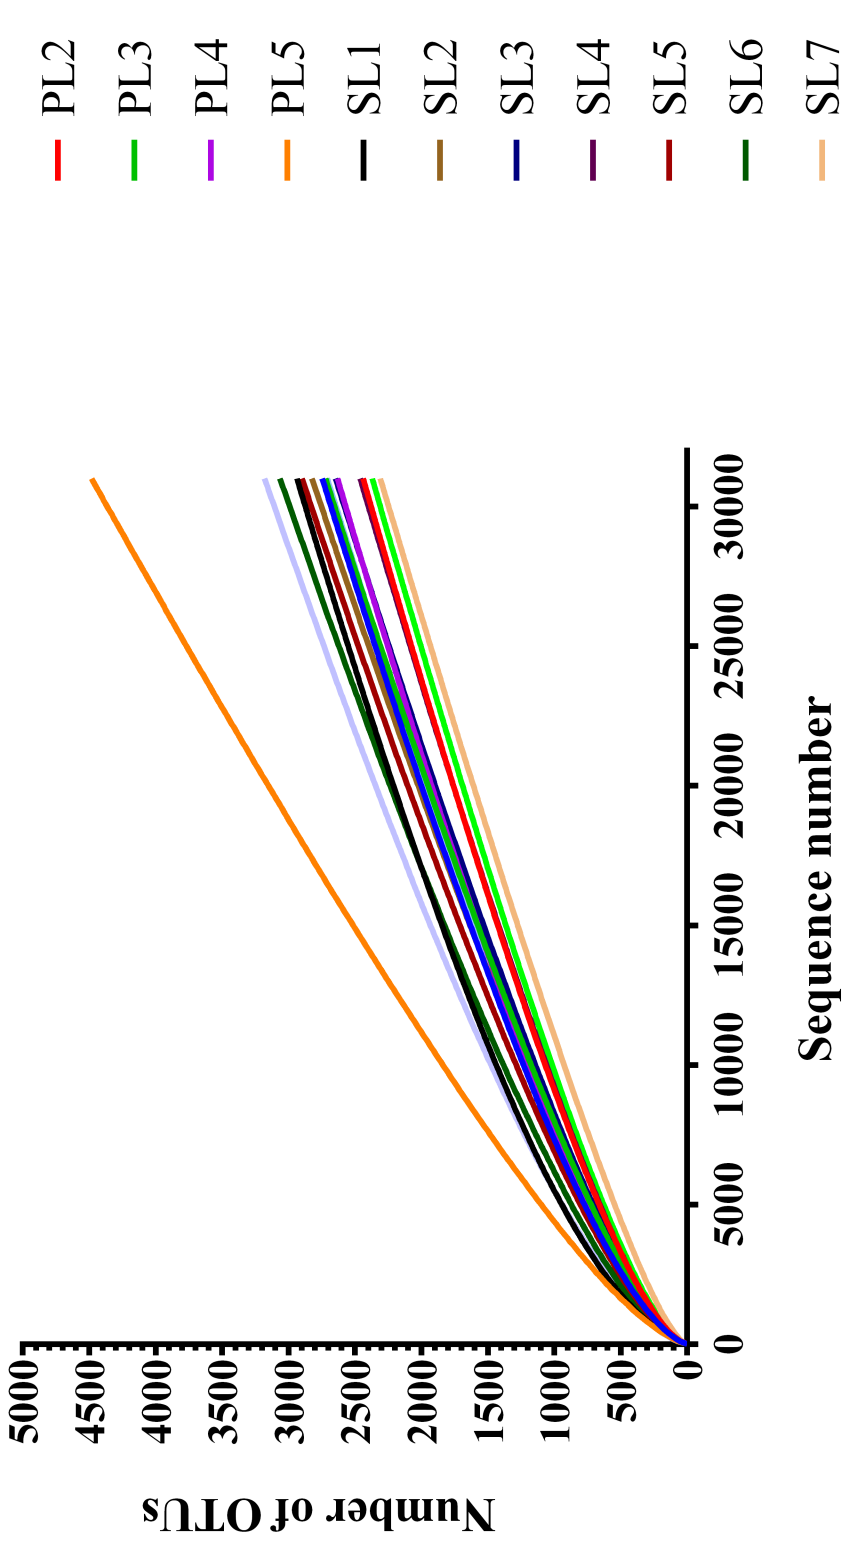

PL1 = Pustular mat layer 1 (0 - 2 mm), PL5 = Pustular mat layer 5 (8 - 10 mm)

SL1 = Smooth mat layer 1 (0 - 2 mm), SL10 = Smooth mat layer 10 (18 - 20 mm)

### Parvarchaeota

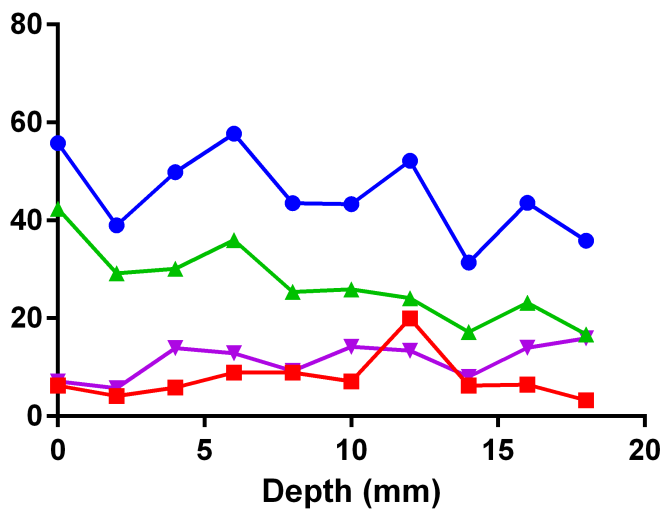

- Parvarchaeota (Phylum)
- Micrarchaea (Class)
- ▲ YLA114 (Order)
- ▼ WCHD3-30 (Order)

### Thermoplasmata

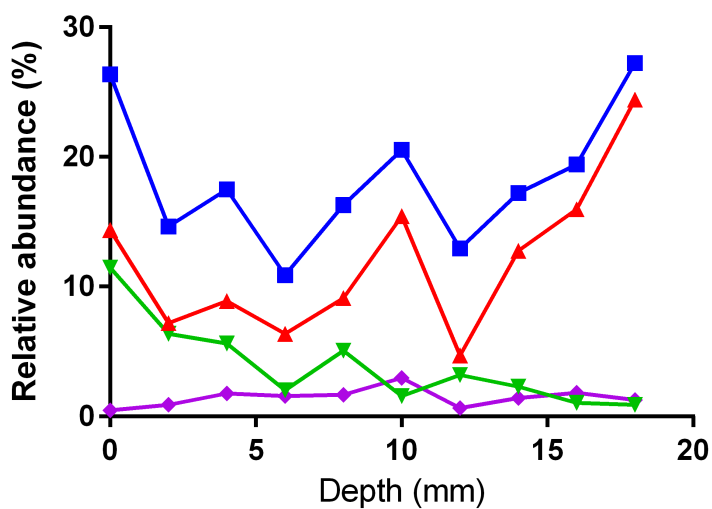

- E2 (Order)
- ▲ DHVEG-1 (Family)
- ▼ CCA47 (Family)
- ◆ Methanomassiliicoccaceae (Family)

### Methanogens

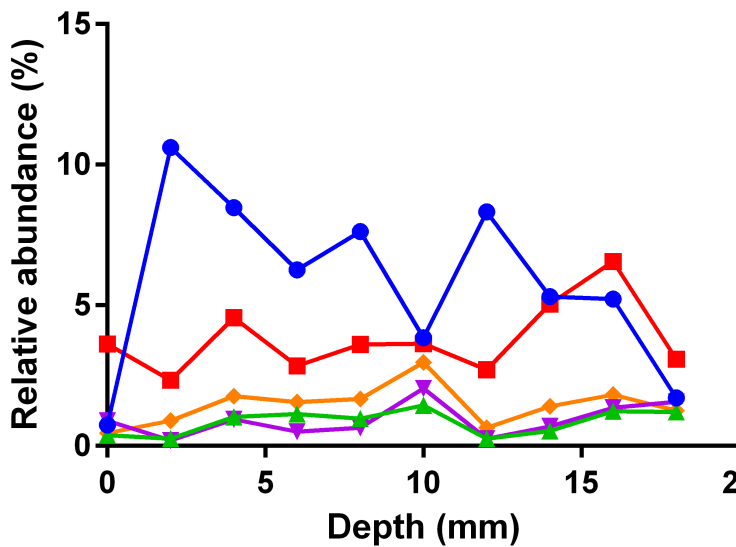

- Methanomicrobiales (Hydrogenotrophic)
- Methanosarcinales
- ▲ Methanococcales
- ▼ Methanobacteriales
- ◆ Methanomassiliicoccaceae

### Others

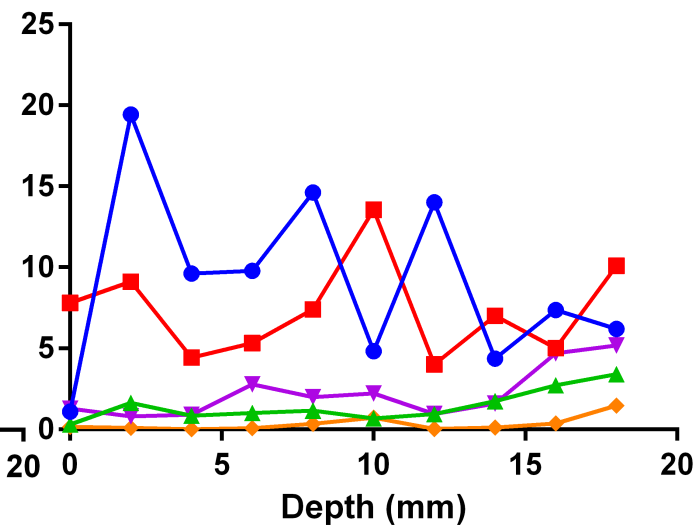

- Marine Benthic Group B (MBGB)
- Halobacteria
- ▲ Thermoprotei
- ▼ Thermococci
- ◆ Miscellaneous Crenarchaeota group (MCG)

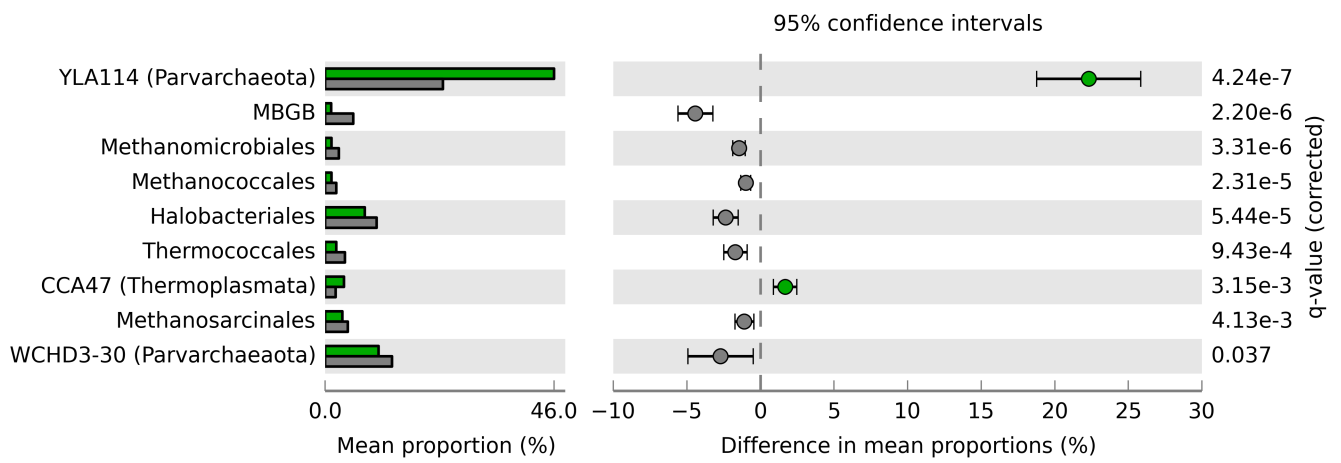

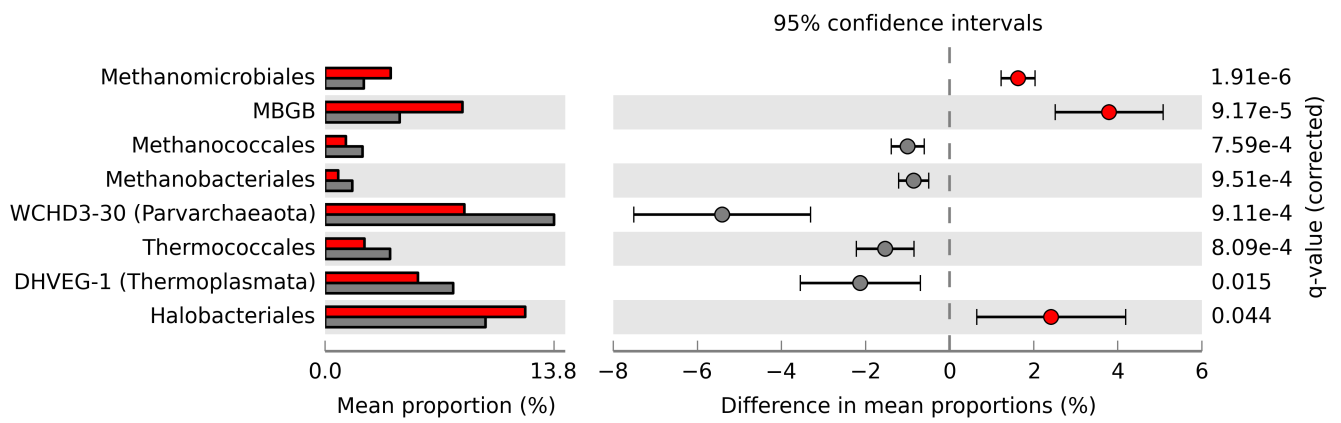

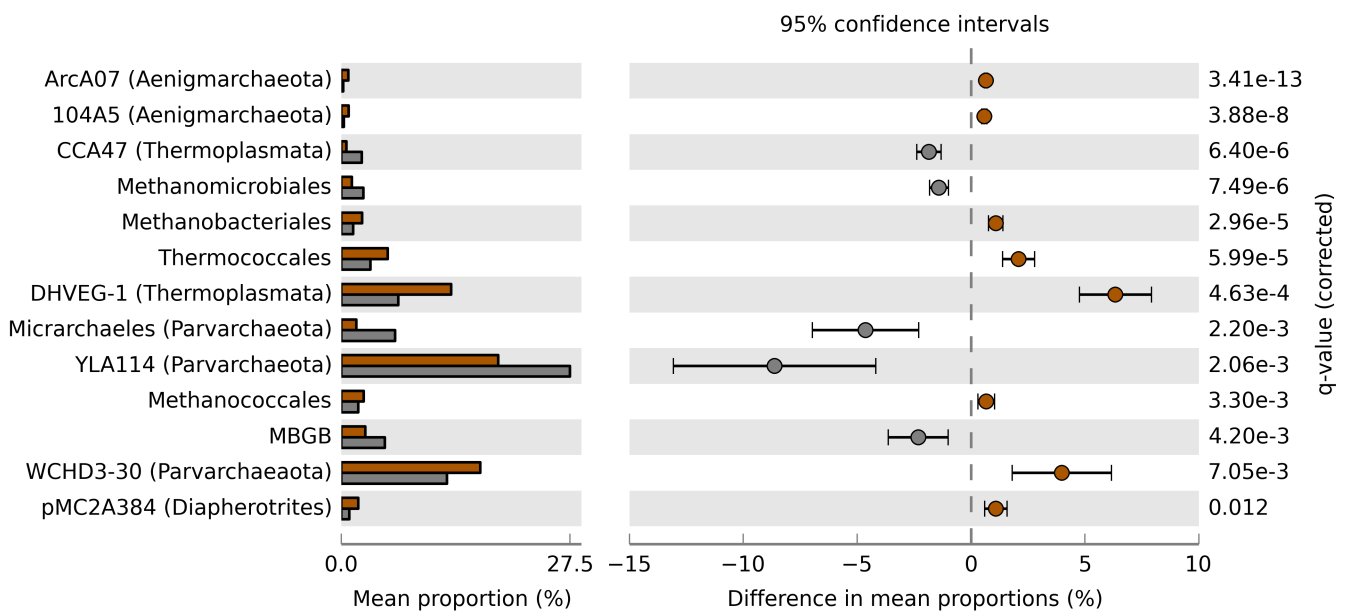



## Halobacteria

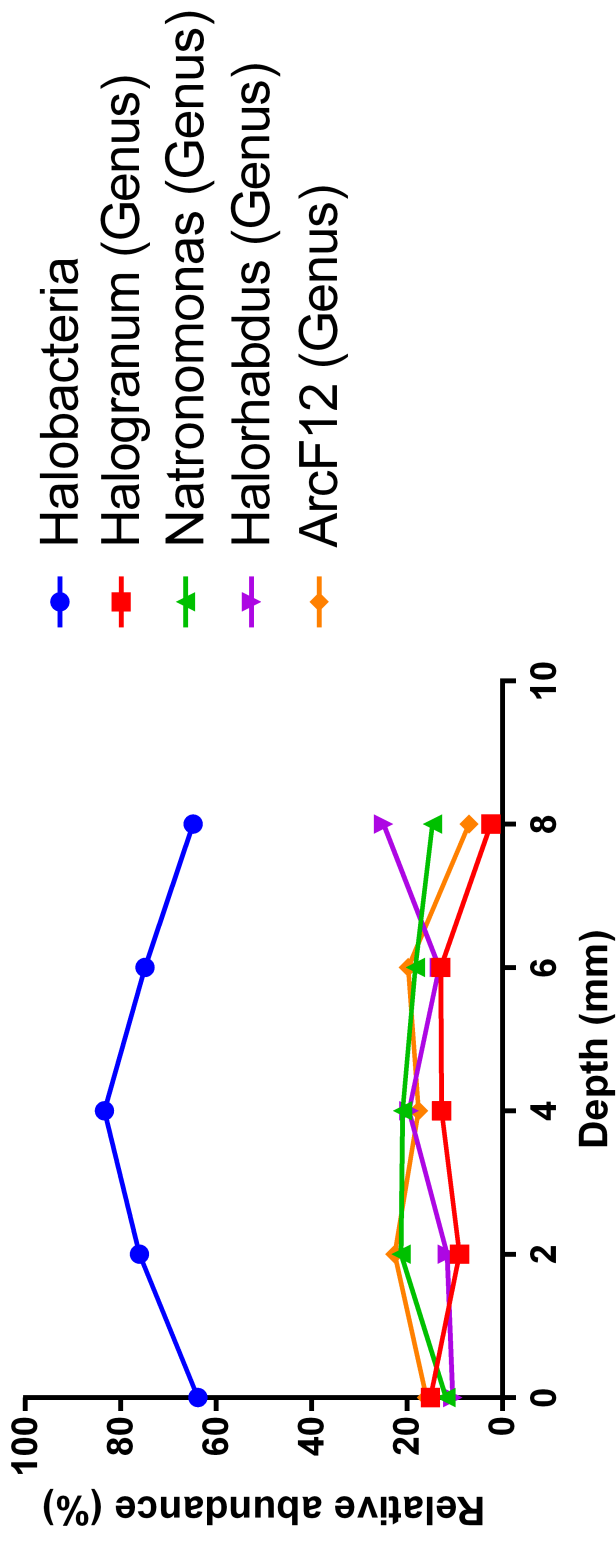

## Parvarchaeota & Thaumarchaeota

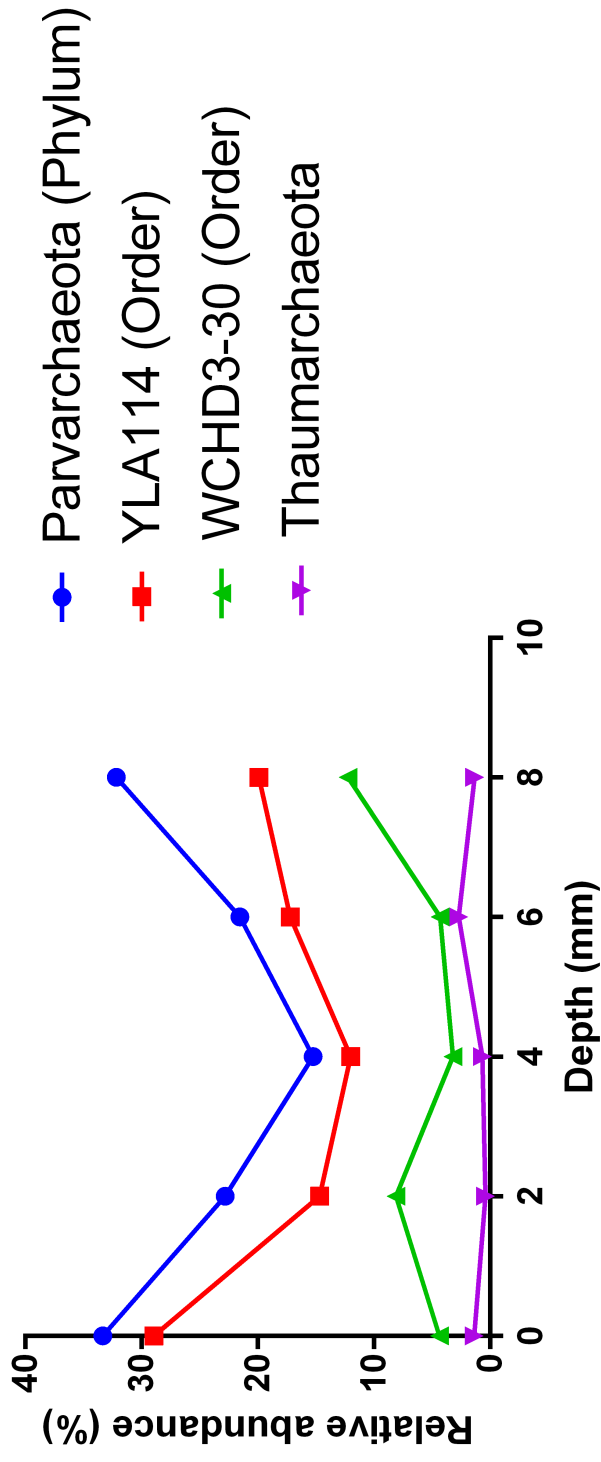

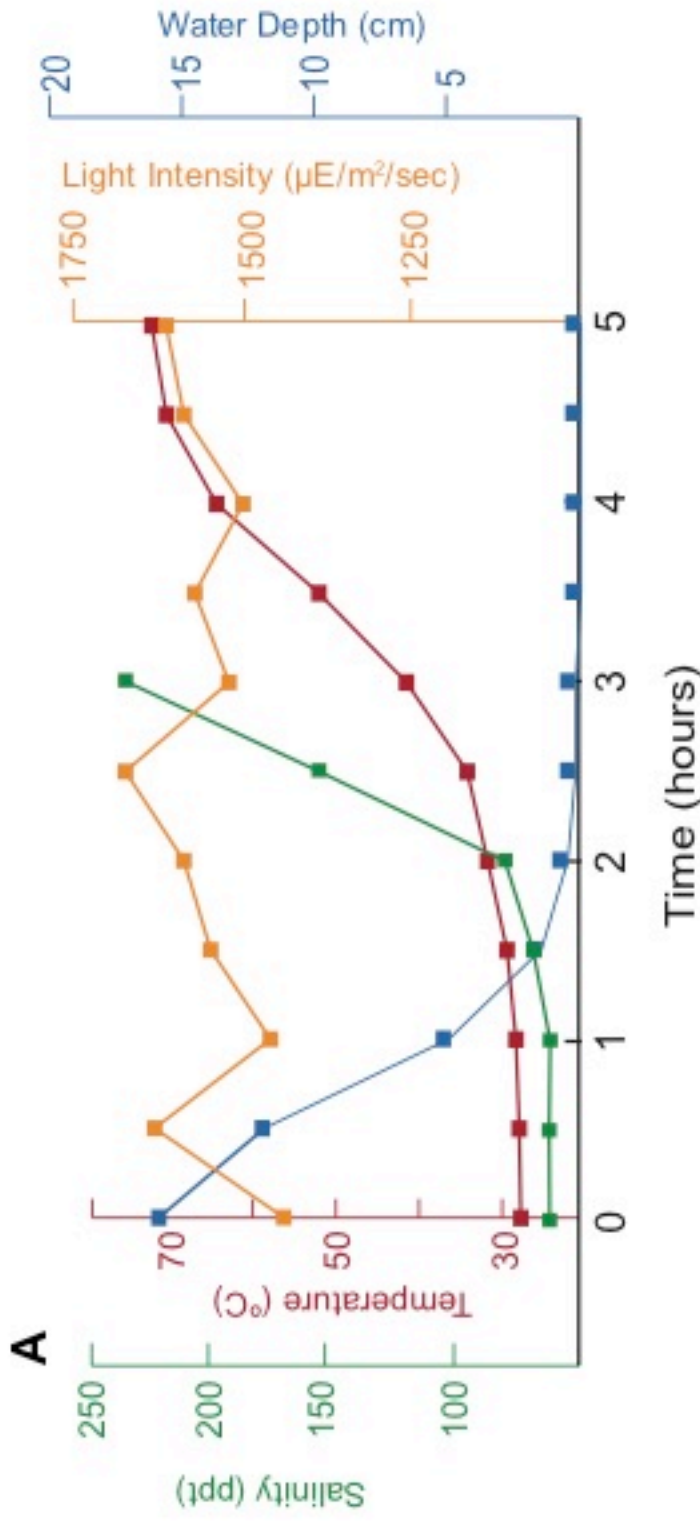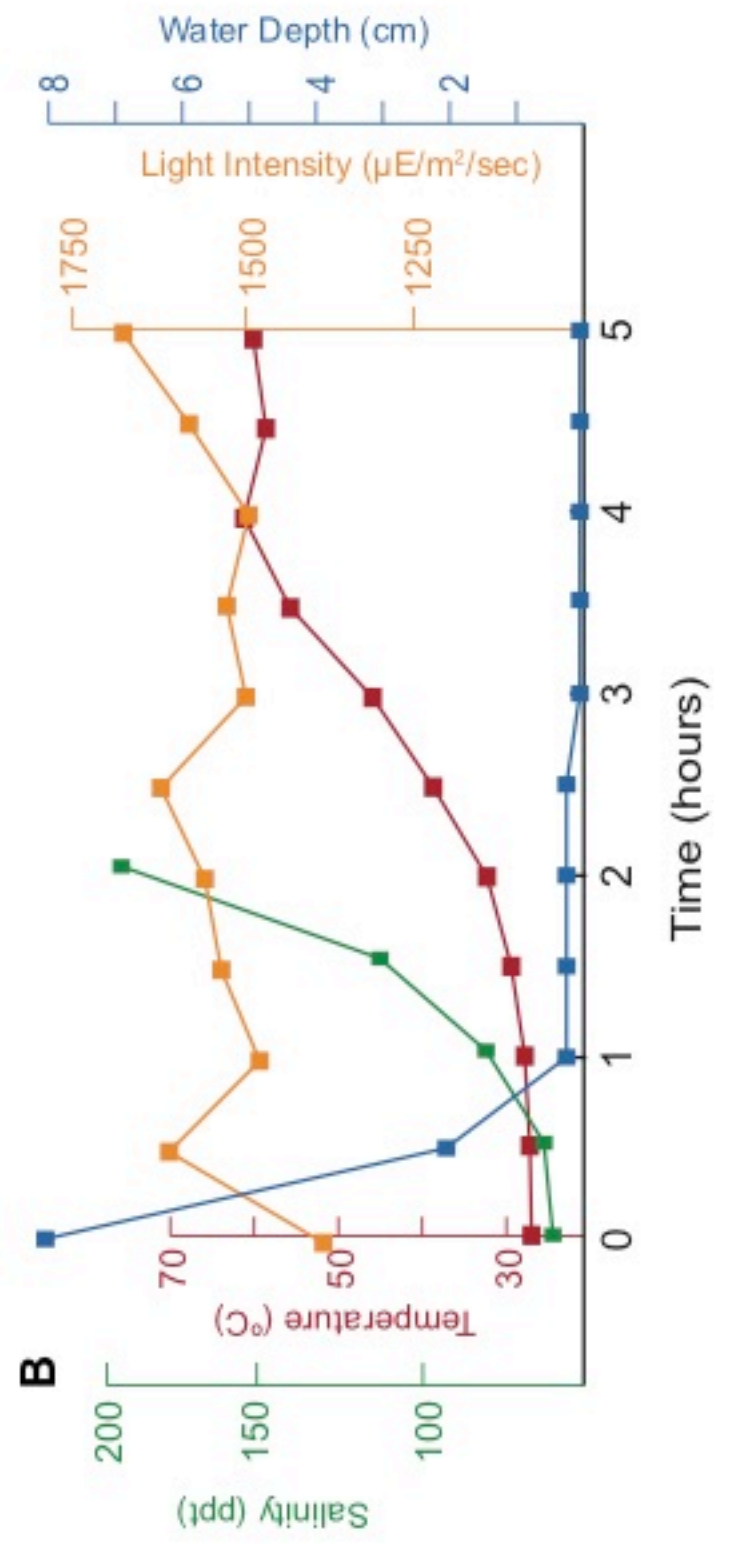

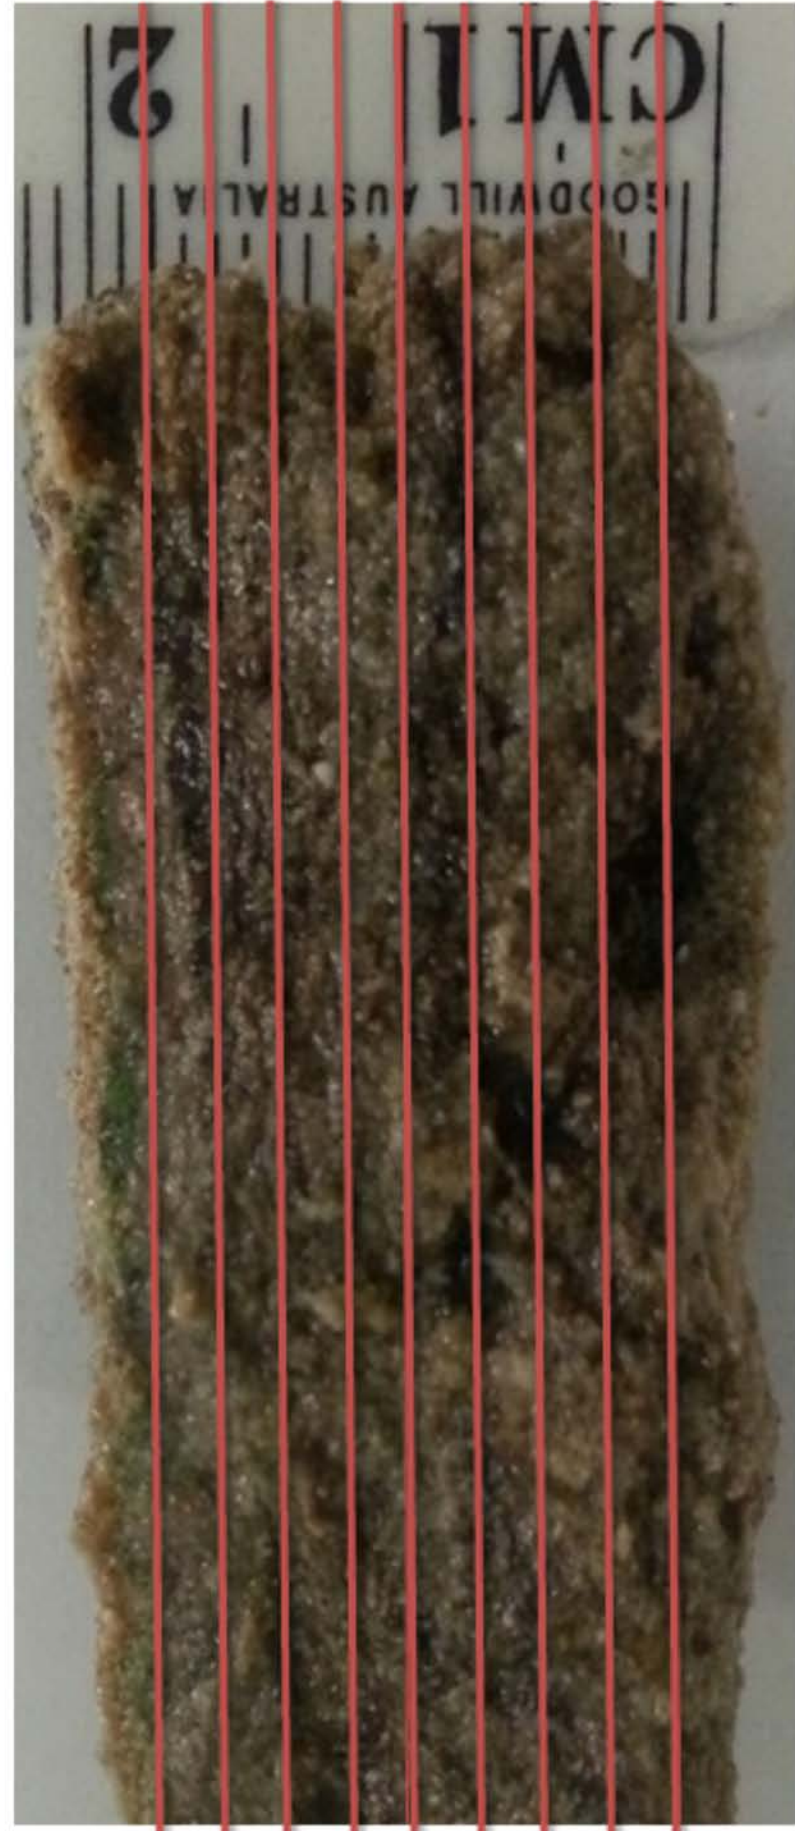

**A**

- 0-2 mm
- 2-4 mm
- 4-6 mm
- 6-8 mm
- 8-10 mm
- 10-12 mm
- 12-14 mm
- 14-16 mm
- 16-18 mm
- 18-20 mm

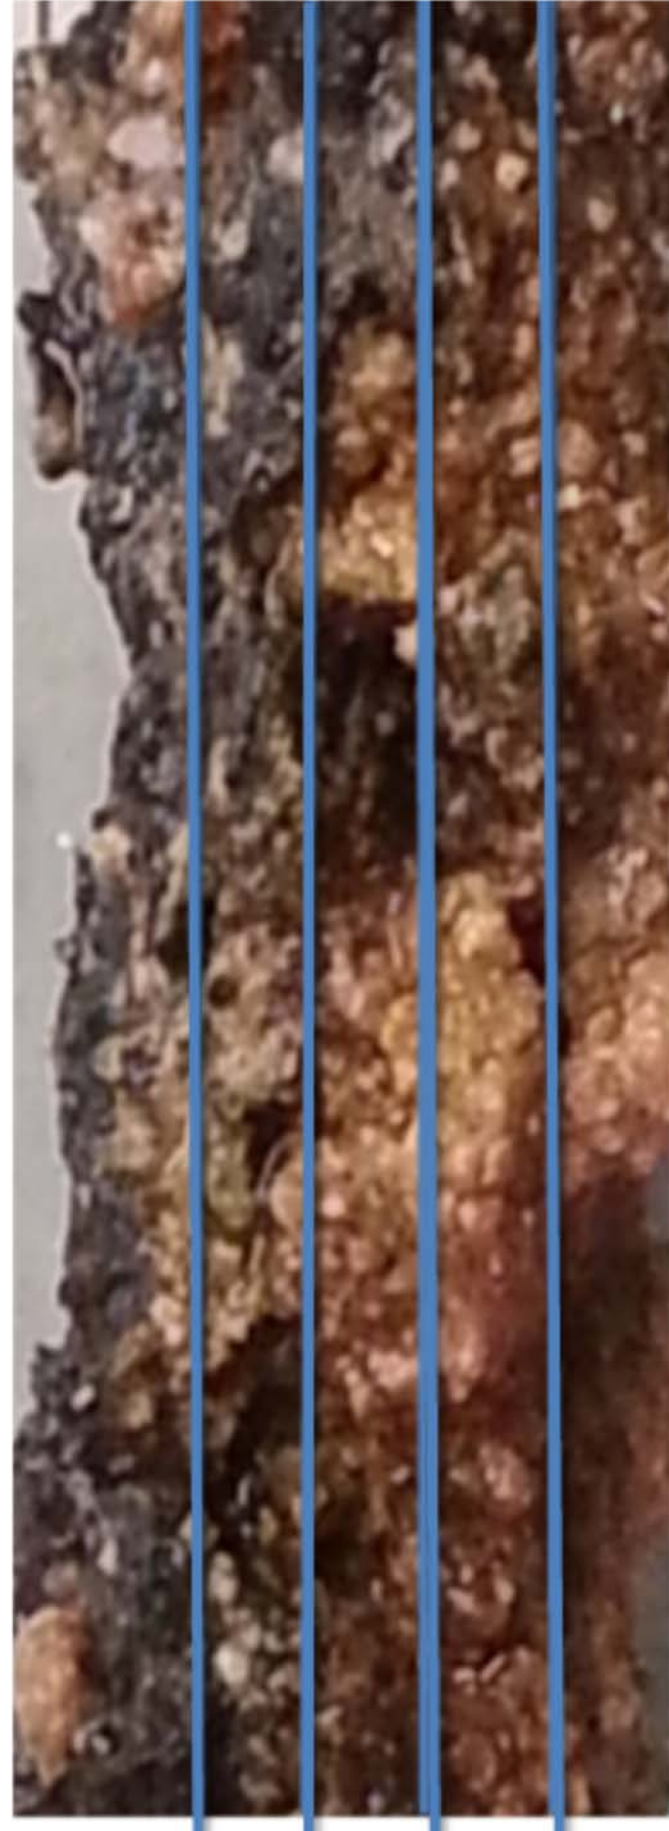

**B**

- 0-2 mm
- 2-4 mm
- 4-6 mm
- 6-8 mm
- 8-10 mm

**Supplementary Table 1.** Archaeal 16S rRNA gene diversity analyses\* of smooth and pustular mats in Shark Bay.

| Mat layers | Depth      | No. of OTUs | Chao <sup>a</sup> | Shannon <sup>b</sup> | Coverage <sup>c</sup> |
|------------|------------|-------------|-------------------|----------------------|-----------------------|
| PL1        | 0 - 2 mm   | 2748.3      | 14952             | 4.805                | 93.45%                |
| PL2        | 2 - 4 mm   | 2441        | 13653             | 4.506                | 94.04%                |
| PL3        | 4 -6 mm    | 2723.3      | 15036             | 4.678                | 93.24%                |
| PL4        | 6 - 8 mm   | 2633.5      | 12527             | 4.829                | 93.82%                |
| PL5        | 8 - 10 mm  | 4484        | 28993             | 5.667                | 88.31%                |
| SL1        | 0 - 2 mm   | 2938.3      | 11128             | 5.418                | 93.73%                |
| SL2        | 2 - 4 mm   | 2825.3      | 15838             | 4.618                | 92.97%                |
| SL3        | 4 -6 mm    | 2648        | 15979             | 4.807                | 93.38%                |
| SL4        | 6 - 8 mm   | 2462.5      | 14880             | 4.837                | 93.84%                |
| SL5        | 8 - 10 mm  | 2900.7      | 14704             | 5.056                | 93.03%                |
| SL6        | 10 - 12 mm | 3067        | 14433             | 5.435                | 92.72%                |
| SL7        | 12 - 14 mm | 2311.5      | 19186             | 3.982                | 93.79%                |
| SL8        | 14 - 16 mm | 2372        | 15250             | 4.503                | 93.99%                |
| SL9        | 16 - 18 mm | 2710.5      | 14445             | 5.152                | 93.51%                |
| SL10       | 18 - 20 mm | 3182        | 14474             | 5.671                | 92.74%                |

\*Calculated at 3% genetic divergence

<sup>a</sup>Chao index measures the species richness (absolute number of species)

<sup>b</sup>Shannon index measures the species diversity (relative species abundance and species evenness)

<sup>c</sup>Good's Coverage measures how well the sample represents the larger environment

**Supplementary Table 2.** Relative abundance of archaeal classes in smooth and pustular mats<sup>a</sup>

|                                     | Halobacteria | MBGB   | Micrarchaea | Thermoplasmata | YLA114 <sup>b</sup> | WCHD3-30 <sup>b</sup> | Methanomicrobia | <i>Nitrosopumilus</i> | Others <sup>c</sup> |
|-------------------------------------|--------------|--------|-------------|----------------|---------------------|-----------------------|-----------------|-----------------------|---------------------|
| Smooth mat (0-20 mm) <sup>d</sup>   | 6.91%        | 9.74%  | 7.84%       | 19.99%         | 27.66%              | 11.00%                | 10.17%          | N/A                   | 6.67%               |
| S1 (0-2 mm) <sup>e</sup>            | 7.80%        | 1.10%  | 6.26%       | 27.23%         | 42.39%              | 7.09%                 | 4.38%           | N/A                   | 3.75%               |
| S2 (2-4 mm) <sup>e</sup>            | 9.11%        | 19.42% | 4.11%       | 16.44%         | 29.14%              | 5.68%                 | 12.95%          | N/A                   | 3.16%               |
| S3 (4-6 mm) <sup>e</sup>            | 4.42%        | 9.61%  | 5.81%       | 19.15%         | 30.13%              | 13.87%                | 13.06%          | N/A                   | 3.94%               |
| S4 (6-8 mm) <sup>e</sup>            | 5.32%        | 9.79%  | 8.93%       | 12.00%         | 35.96%              | 12.80%                | 9.11%           | N/A                   | 6.10%               |
| S5 (8-10 mm) <sup>e</sup>           | 7.41%        | 14.62% | 8.92%       | 17.70%         | 25.35%              | 9.25%                 | 11.26%          | N/A                   | 5.51%               |
| S6 (10-12 mm) <sup>e</sup>          | 7.95%        | 6.66%  | 6.37%       | 22.05%         | 25.89%              | 14.15%                | 7.55%           | N/A                   | 9.37%               |
| S7 (12-14 mm) <sup>e</sup>          | 4.00%        | 17.56% | 19.98%      | 10.62%         | 24.23%              | 7.94%                 | 12.96%          | N/A                   | 2.70%               |
| S8 (14-16 mm) <sup>e</sup>          | 8.00%        | 5.09%  | 8.43%       | 24.83%         | 23.68%              | 9.35%                 | 13.75%          | N/A                   | 6.86%               |
| S9 (16-18 mm) <sup>e</sup>          | 5.02%        | 7.36%  | 6.42%       | 21.06%         | 23.17%              | 13.99%                | 11.82%          | N/A                   | 11.17%              |
| S10 (18-20 mm) <sup>e</sup>         | 10.09%       | 6.20%  | 3.20%       | 28.86%         | 16.70%              | 15.92%                | 4.86%           | N/A                   | 14.18%              |
| Pustular mat (0-10 mm) <sup>f</sup> | 72.67%       | 0.02%  | 0.01%       | 0.26%          | 18.56%              | 6.46%                 | 0.35%           | 1.21%                 | 0.45%               |
| P1 (0-2 mm) <sup>g</sup>            | 63.91%       | 0.06%  | 0.01%       | 0.64%          | 28.95%              | 4.39%                 | 0.27%           | 1.22%                 | 0.55%               |
| P2 (2-4 mm) <sup>g</sup>            | 76.16%       | 0.01%  | 0.01%       | 0.15%          | 14.69%              | 8.13%                 | 0.19%           | 0.38%                 | 0.28%               |
| P3 (4-6 mm) <sup>g</sup>            | 83.42%       | 0.04%  | 0.00%       | 0.08%          | 12.02%              | 3.22%                 | 0.28%           | 0.66%                 | 0.28%               |
| P4 (6-8 mm) <sup>g</sup>            | 74.94%       | 0.01%  | 0.00%       | 0.26%          | 17.22%              | 4.32%                 | 0.26%           | 2.62%                 | 0.37%               |
| P5 (8-10 mm) <sup>g</sup>           | 64.91%       | 0.00%  | 0.01%       | 0.19%          | 19.92%              | 12.26%                | 0.77%           | 1.15%                 | 0.79%               |

<sup>a</sup>Relative abundance calculated as the average archaeal composition of the layers, using clustered OTUs at 97% cut-off of archaeal 16S rDNA

<sup>b</sup>Parvarchaeal order YLA114 and WCHD3-30 are the only two orders of class Parvarchaea

<sup>c</sup>Others include archaeal classes Thermoprotei, Methanococci, Thermococci, Methanobacteria, Aigarchaeota, Nanoarchaeoti, DSEG, MCG,

MHVG and other Thaumarchaeota (excluding genus *Nitrosopumilus*)

<sup>d</sup>Relative abundance of each class for the whole mat (smooth)

<sup>e</sup>Relative abundance of each discrete 2-mm layer in smooth mats (S1-S10)

<sup>f</sup>Relative abundance of each class for the whole mat (pustular)

<sup>g</sup>Relative abundance of each discrete 2-mm layer in pustular mats (P1-P5)
